# Supplementary material for: JNK1 activation predicts the prognostic outcome of the human hepatocellular carcinoma
Source: PubMed Central journal article supplement (PMC2732591; doi:10.1186/1476-4598-8-64), 2009-08-17
Supplement: 1476-4598-8-64-S8.pdf [file 1476-4598-8-64-S8.pdf]

Supplementary table 8: Top 5 pathways of the up- and down-regulated genes in H-JNK1 HCC from Ingenuity Pathway Analysis

| Pathways                         | P-value           | Molecules |
|----------------------------------|-------------------|-----------|
| <b>Up</b>                        |                   |           |
| Cellular growth & proliferation  | 5.71E-30-1.17E-03 | 226       |
| Cell cycle                       | 3.29E-24-1.20E-03 | 124       |
| Cell Death                       | 5.40E-23-1.16E-03 | 188       |
| Cellular assembly & organization | 7.21E-13-1.09E-03 | 62        |
| DNA replication, Recombination   | 7.21E-13-1.13E-03 | 83        |
| <b>Down</b>                      |                   |           |
| Lipid metabolism                 | 6.37E-39-9.31E-04 | 164       |
| Small molecular biochemistry     | 6.37E-39-1.19E-03 | 239       |
| Amino acid metabolism            | 5.33E-25-1.19E-03 | 58        |
| Molecular transport              | 7.32E-21-8.66E-04 | 123       |
| Drug metabolism                  | 1.00E-13-9.59E-04 | 45        |
