# Supplementary material for: JNK1 activation predicts the prognostic outcome of the human hepatocellular carcinoma
Source: PubMed Central journal article supplement (PMC2732591; doi:10.1186/1476-4598-8-64), 2009-08-17
Supplement: 1476-4598-8-64-S9.pdf [file 1476-4598-8-64-S9.pdf]

**Supplementary Table 9:**  
Levels of HB signature genes in  
H-JNK1 HCC tissue

| 16 HB<br>Signature genes | Folds of<br>H-JNK1/L-JNK1 |
|--------------------------|---------------------------|
| GHR                      | -19.49                    |
| APCS                     | -9.44                     |
| ALDH2                    | -9.12                     |
| C1S                      | -41.83                    |
| AQP9                     | -684.5                    |
| CYP2E1                   | -243.6                    |
| APOC4                    | -109.7                    |
| HPD                      | -1864                     |
| NLE                      | 1.1                       |
| RPL10A                   | 1.92                      |
| E2F5                     | 1.66                      |
| BUB1                     | 6.7                       |
| DLG7                     | 13.2                      |
| IGSF1                    | 1.34                      |
| AFP                      | 53.6                      |
| DUSP9                    | 7.7                       |
