# Supplementary material for: JNK1 activation predicts the prognostic outcome of the human hepatocellular carcinoma
Source: PubMed Central journal article supplement (PMC2732591; doi:10.1186/1476-4598-8-64), 2009-08-17
Supplement: 1476-4598-8-64-S10.pdf [file 1476-4598-8-64-S10.pdf]

**Supplementary Table 10:**  
Expression of the progenitor and imprinted genes in H-JNK1 HCC tissue

| Progenitor |       | Imprinted |       |
|------------|-------|-----------|-------|
| Genes      | Folds | Genes     | Folds |
| AFP        | 53.6  | PEG10     | 206.0 |
| KRT19      | 34.0  | H19       | 65.0  |
| TACSTD1    | 30.0  | SGCE      | 29.0  |
| DKK1       | 7.5   | DLK1      | 17.7  |
| PROM1      | 6.7   | PHLDA2    | 14.0  |
| KRT7       | 5.7   | IGF2      | 12.8  |
| THY1       | 2.3   | PPP1AR9A  | 12.8  |
| VIM        | 2.0   | CDKN1C    | 11.3  |
|            |       | MEG3      | 8.5   |
|            |       | ZNF331    | 5.1   |
|            |       | NDN       | 4.9   |
|            |       | PEG3      | 4.0   |
|            |       | INPP5F    | 3.5   |
|            |       | SLC22A3   | 3.2   |
|            |       | ATP10A    | 2.5   |
|            |       | KCNQ10T1  | 2.0   |
|            |       | UBE3A     | 2.0   |
